# Supplementary material
Source: PubMed Central journal article supplement (PMC7818305)
Supplement: ao0c04259_si_001.pdf [file ao0c04259_si_001.pdf]

## SUPPORTING INFORMATION

**LC/MS-based global metabolomics identification of serum biomarkers differentiating hepatocellular carcinoma from chronic hepatitis B and liver cirrhosis**

Hong Y.Pan<sup>1†</sup>, Qing Q. Wu<sup>1,2†</sup>, Qiao Q. Yin<sup>1,3</sup>, Yi N. Dai<sup>1</sup>, Yi C. Huang<sup>1</sup>, Wei Zheng<sup>1</sup>, Tian C. Hui<sup>1,3†</sup>, Mei J. Chen<sup>1</sup>, Ming S. Wang<sup>1</sup>, Jia J. Zhang<sup>1</sup>, Hai J. Huang<sup>1\*</sup>, Yong X. Tong<sup>1\*</sup>

<sup>1</sup> Department of Infectious Diseases, Zhejiang Provincial People's Hospital, People's Hospital of Hangzhou Medical College, No. 158 Shangtang Road, Hangzhou, Zhejiang 310014, China.

<sup>2</sup> The Second Clinical Medical College, Zhejiang Chinese Medical University, No. 548 Binwen Road, Hangzhou, Zhejiang, 310053, China.

<sup>3</sup> Bengbu Medical College, No. 2600 Donghai Road, Bengbu, Anhui, 233030, China.

† These authors contributed equally to this work.

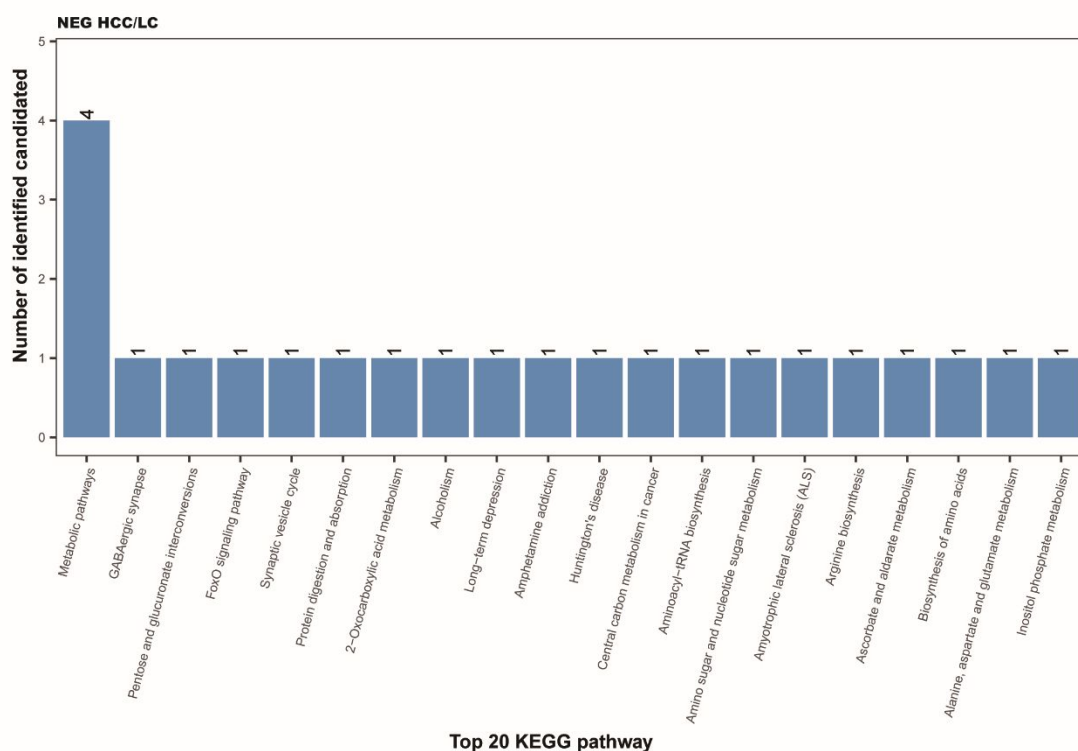

**FigureS1.** Identified metabolites classified into the top 20 KEGG pathways with HCC vs. LC patients in the NEG model.

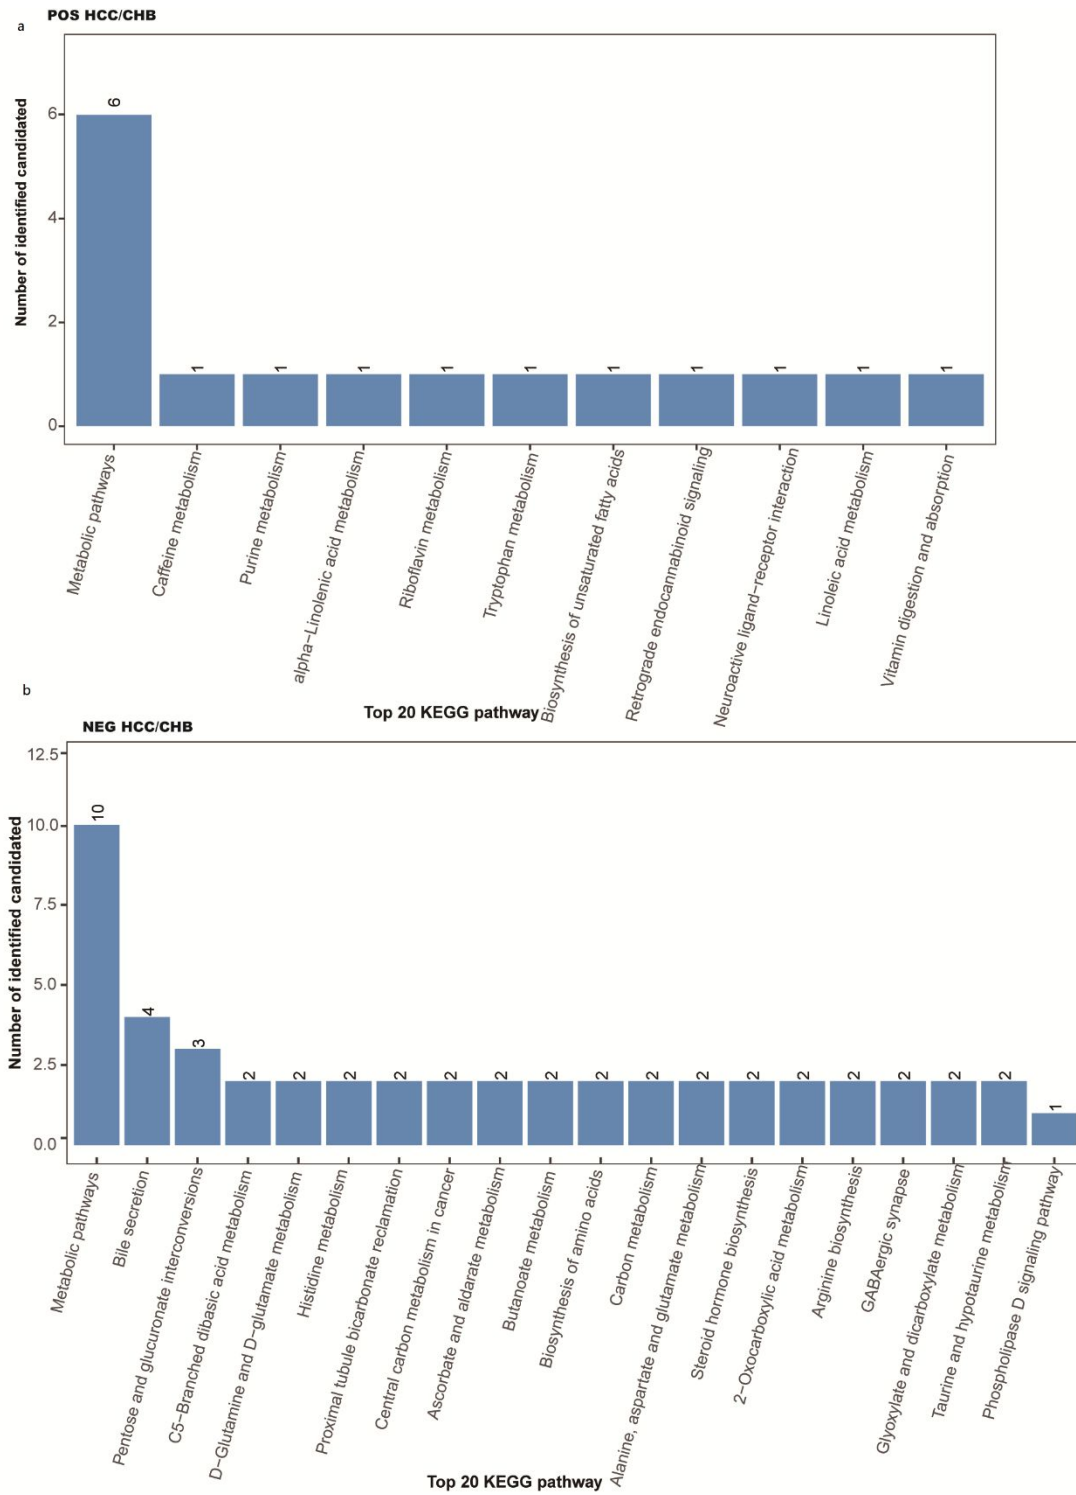

**FigureS2.** Identified metabolites classified into the top 20 KEGG pathways with HCC vs. CHB patients in the POS model(a) and the NEG model(b).

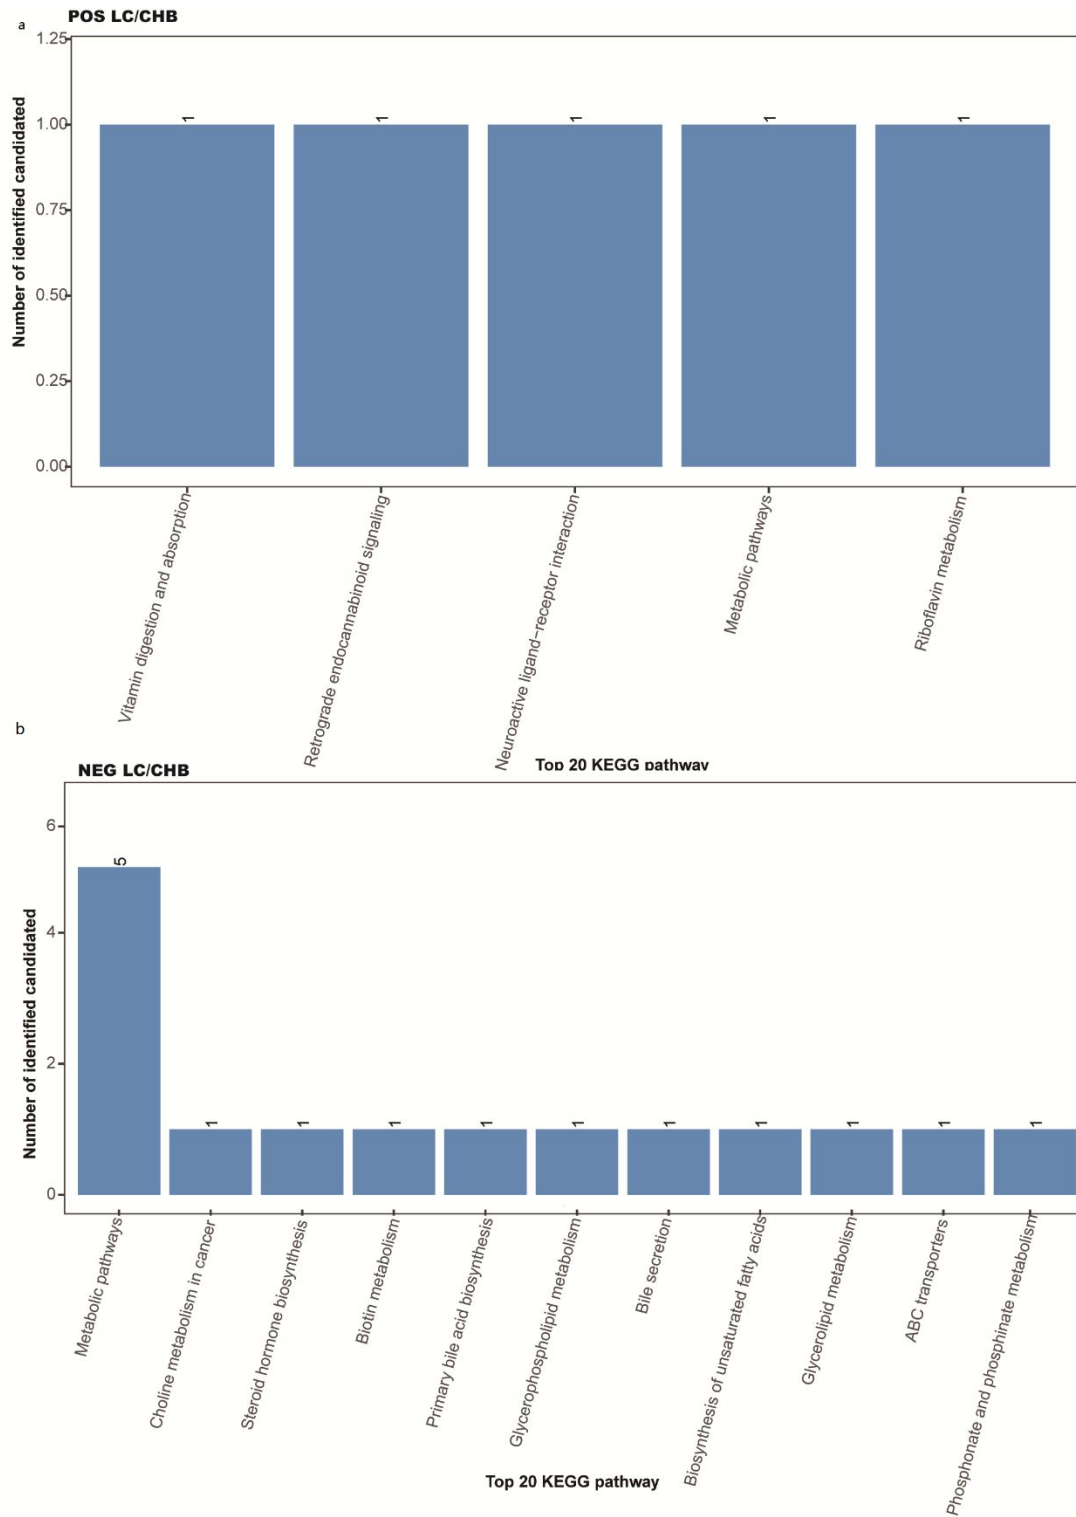

**FigureS3.** Identified metabolites classified into the top 20 KEGG pathways with LC vs. CHB patients in the POS model(a) and the NEG model(b).

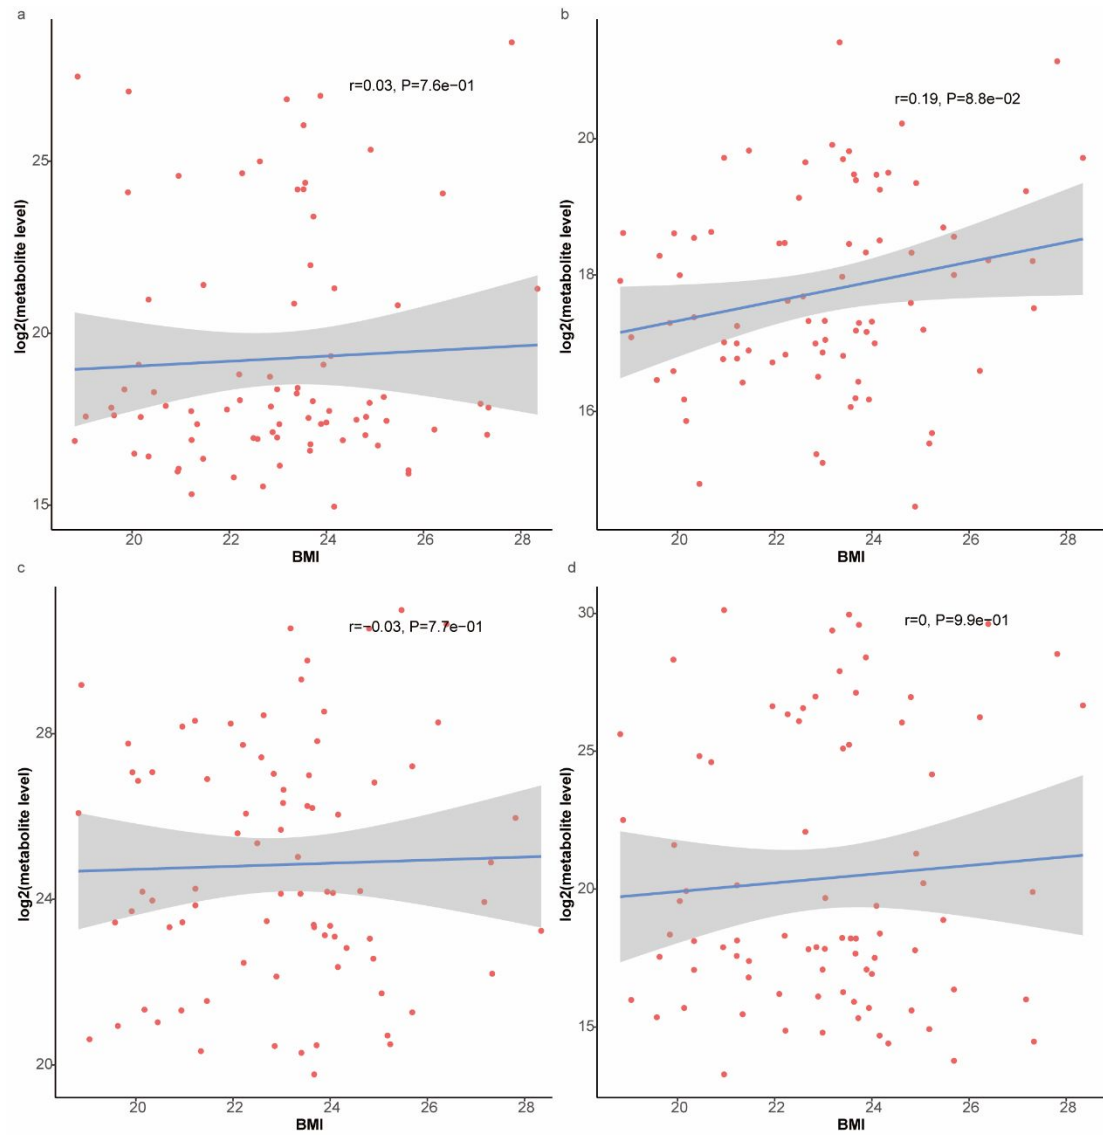

**FigureS4.** Correlation analysis between the levels of these different metabolites and the BMI levels.1,2-

Diacyl-3-beta-D-galactosyl-sn-glycerol(a);5-hydroxy-6E,8Z,11Z,14Z,17Z-eicosapentaenoic acid

(b);taurodeoxy cholic acid (c)and glycyrrhizic acid(d).

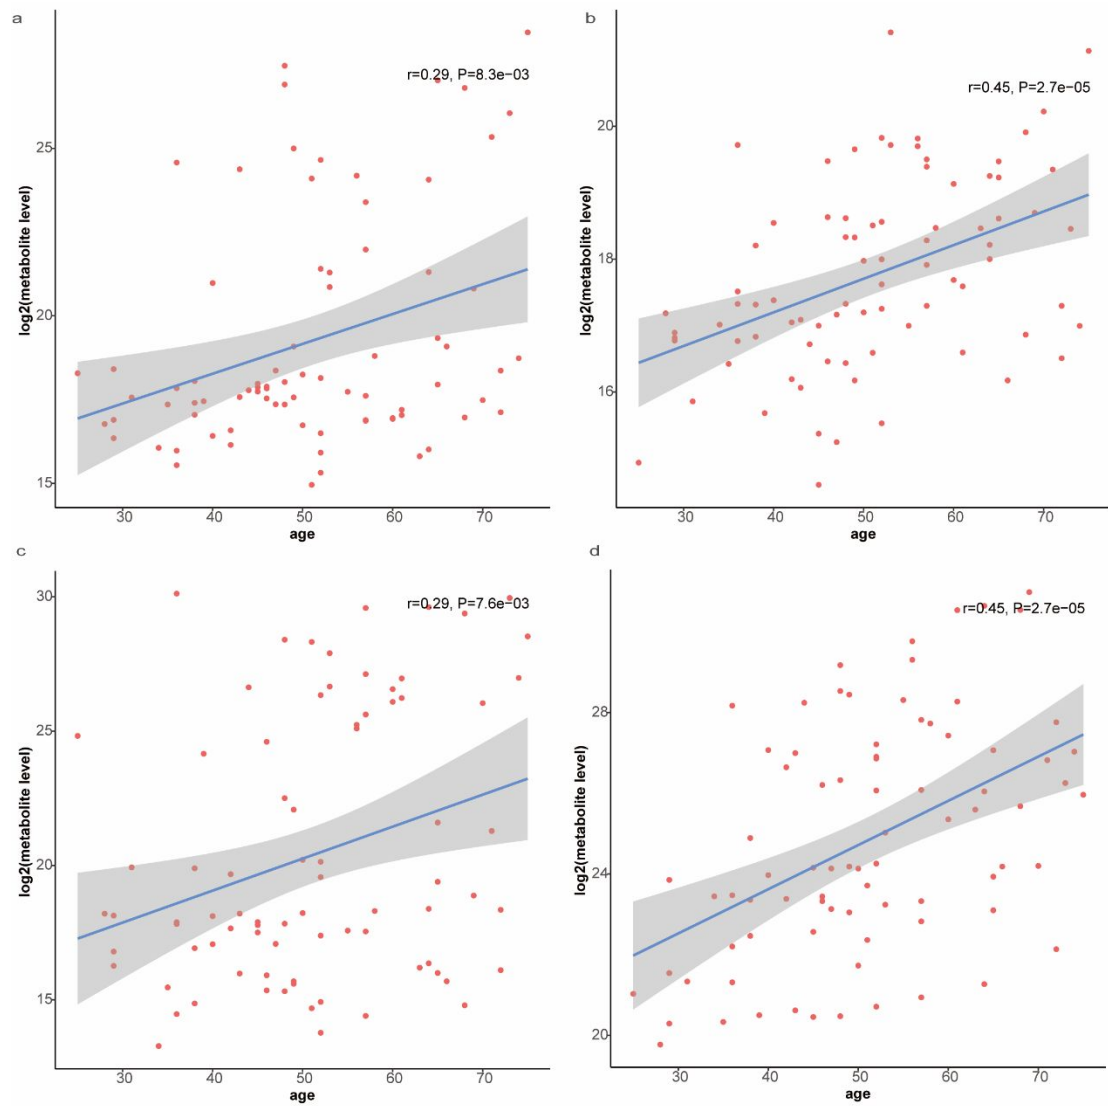

**FigureS5.**Correlation analysis between the levels of these different metabolites and the age.

1,2-Diacyl-3-beta-D-galactosyl-sn-glycerol(a);5-hydroxy-6E,8Z,11Z,14Z,17Z-eicosapentaenoic acid  
(b);taurodeoxy cholic acid (c)and glycyrrhizic acid(d).

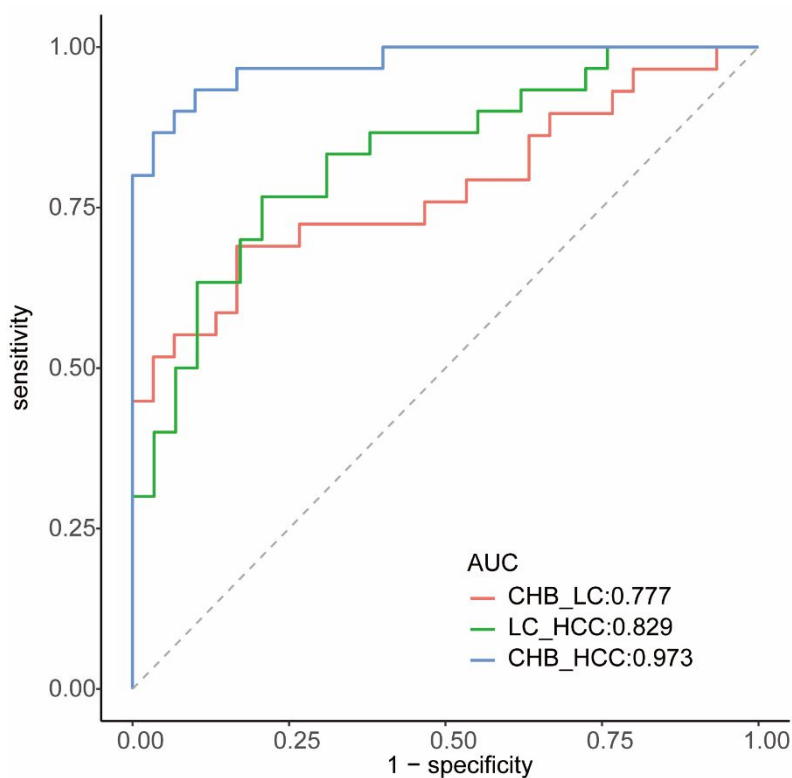

**FigureS6.** The four metabolites could offer better AUC for the three way comparisons (HCC vs. LC, LC vs. CHB, HCC vs. CHB) using a regression model.

**TableS1.** ion intensity information, and retention time of the metabolites.

Because tableS1 size is too big to stick on this table, it can only be uploaded as an attachment. Please see the attachment

**TableS2.** The different metabolites between three groups, HCC vs. LC, HCC vs. CHB, and LC.

Because tableS2 size is too big to stick on this table, it can only be uploaded as an attachment. Please see the attachment
